# Supplementary material for: Comparative transcriptome analysis of female and male finepatterned puffer (Takifugu poecilonotus): identification of candidate genes and pathways associated with growth and gonad differentiation
Source: Research Square preprint supplement (doi:10.21203/rs.3.rs-396640/v1), 2021-04-13
Supplement: Supplementary file 1 [file 72a1e2e64efd209cf86d17ef.docx]

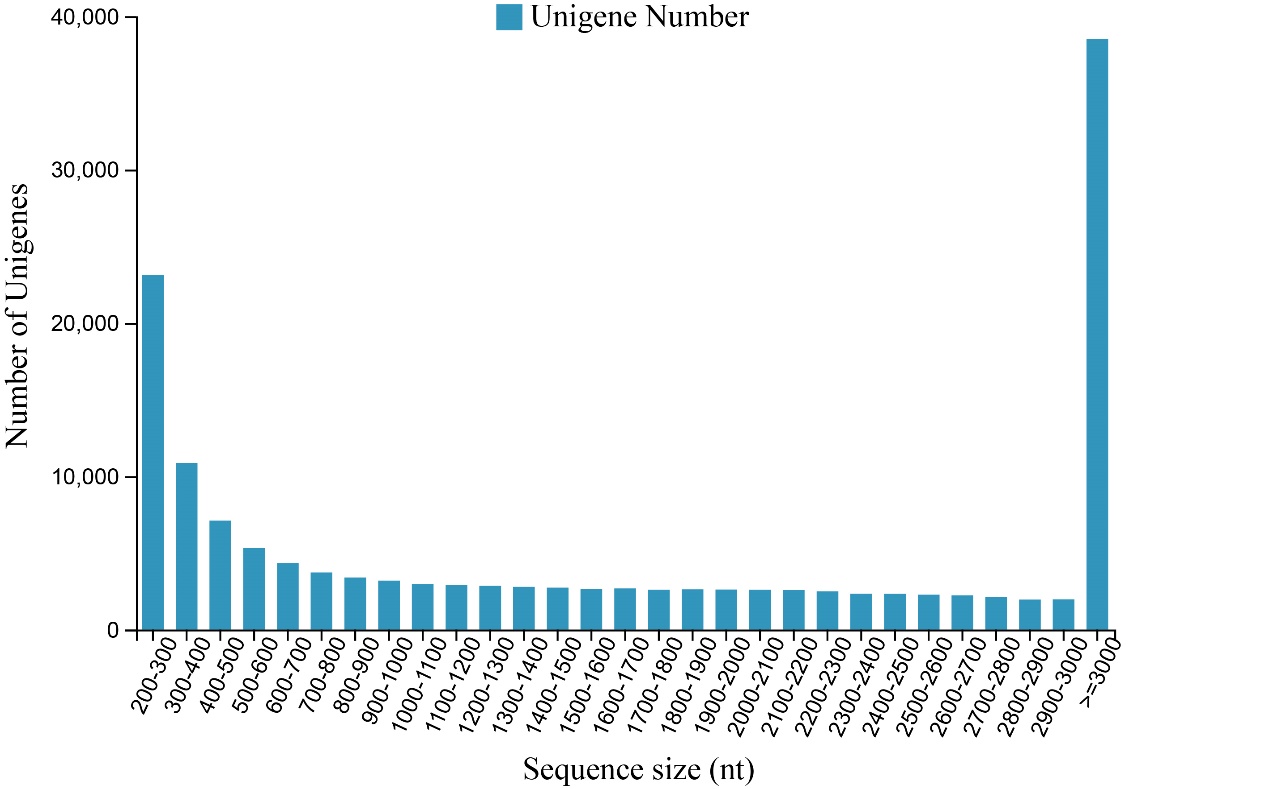


Figure S1. The length distribution of the unigenes.


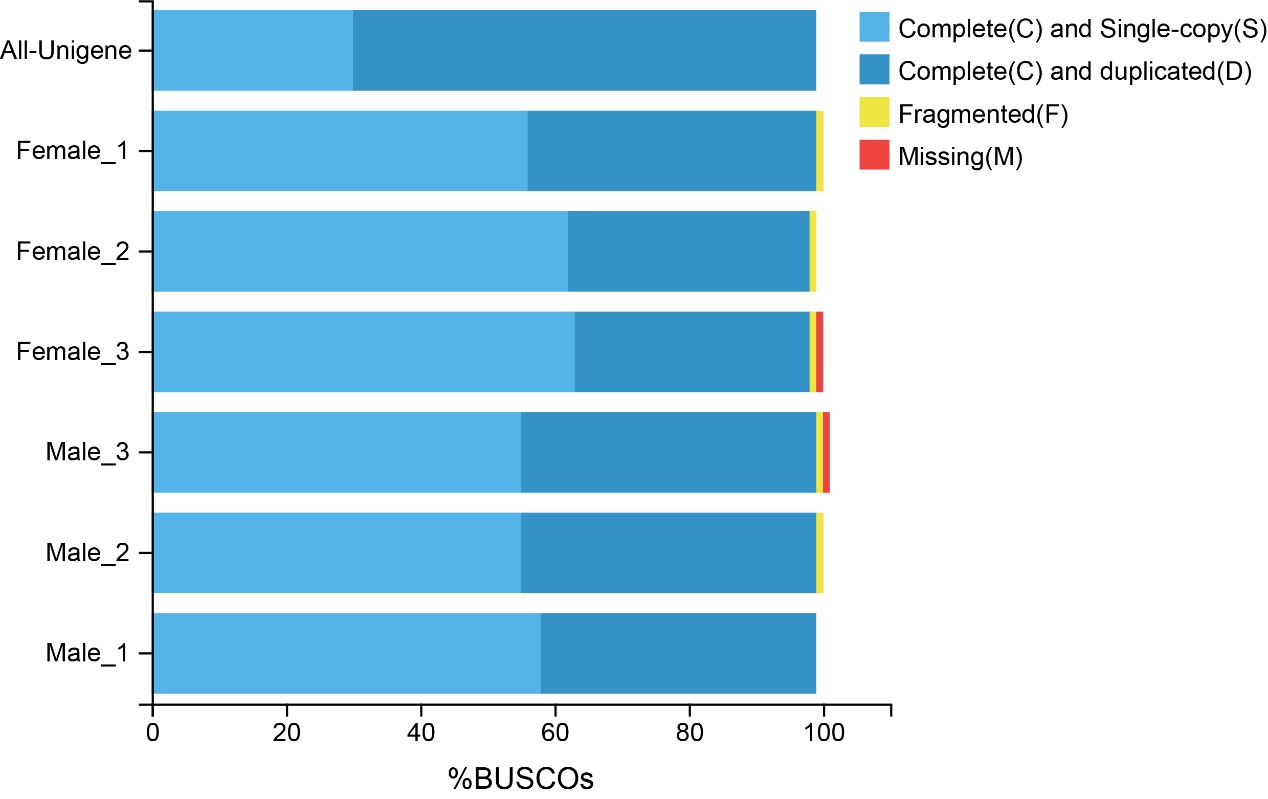


Figure S2. Completeness of the assembly and annotations.


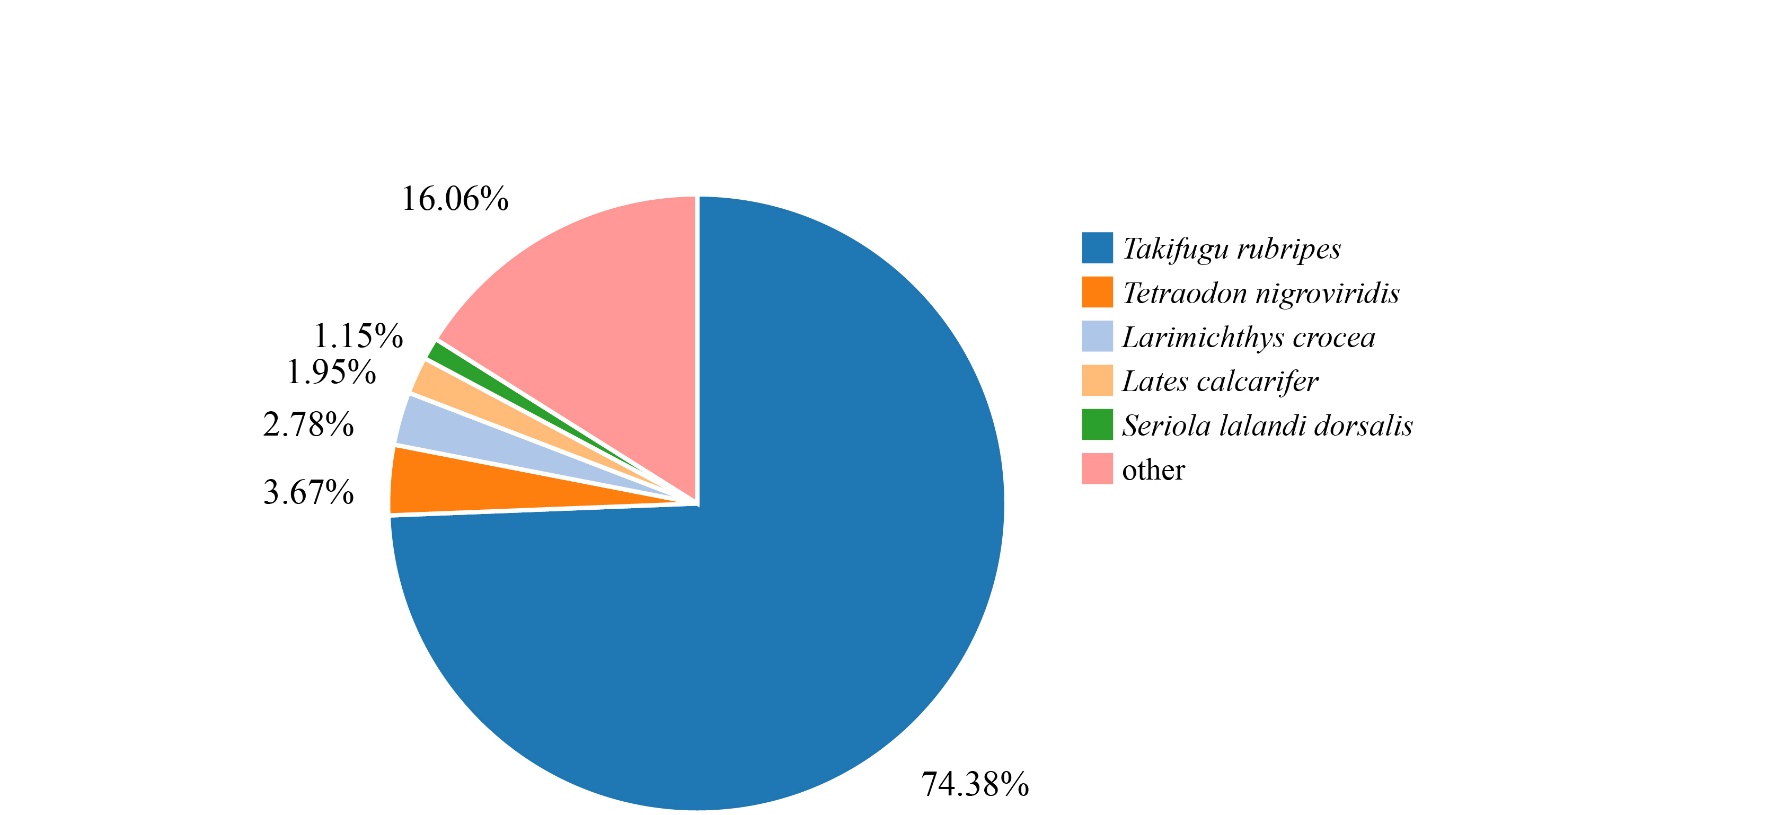


Figure S3. Distribution of the unigene hits by species in the NR database.


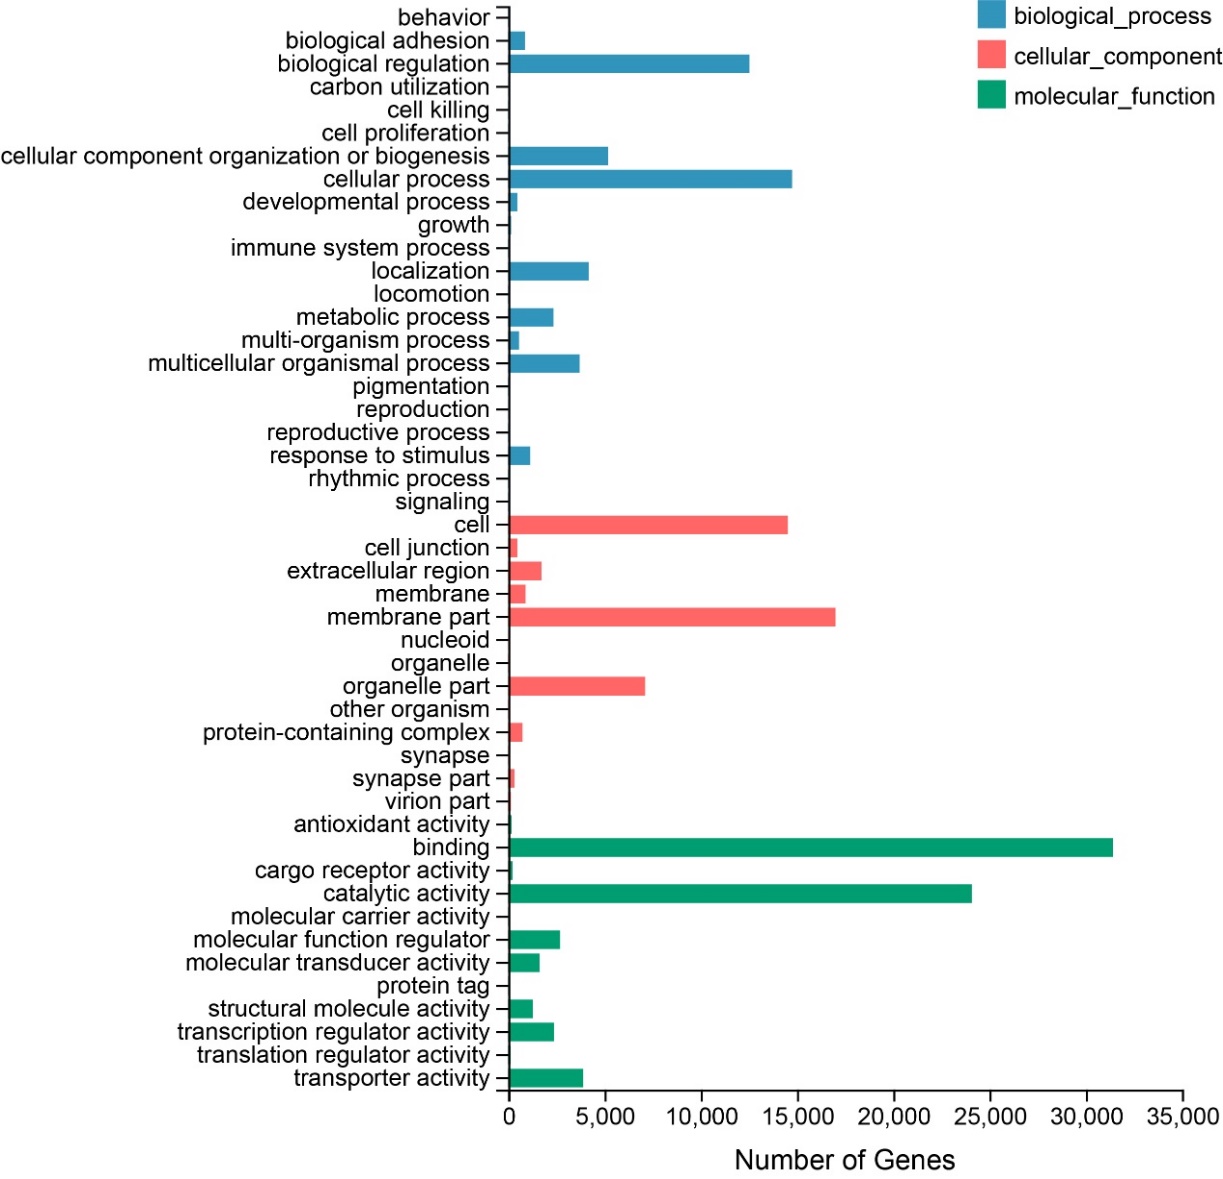


Figure S4. GO terms for the DEGs in the biological process, cellular component, and molecular function categories.

Table S1. Specific primers for the selected unigenes and reference genes.

| Primers | Sequences (5'to3') |
| --- | --- |
| 191-1.CL12876-F | ACAGCAAAGAGGTGGTGGCA |
| 191-1.CL12876-R | TTCTCCATTACAGTCGCGGC |
| 191-2.Unigene147-F | TCTTGCTGTTTGGCCTTGGA |
| 191-2.Unigene147-R | CCCAATTGTGTGCCTTGACC |
| 191-3.CL212-F | CAATGTGCGGAAGCAGATGT |
| 191-3.CL212-R | GCCATACAATGCCACCCTCT |
| 191-4.Unigene16662-F | CCGCCAGATGACCTTGTGTT |
| 191-4.Unigene16662-R | CCAGCCCCTTGATCTCATCA |
| 191-5.Unigene15730-F | GTTTCAGCAATGGTGCGGTC |
| 191-5.Unigene15730-R | AGCGGCTGCAACAAGACAGT |
| 191-6.CL5341-F | CGGTGTTTTTGCTCCTTTGC |
| 191-6.CL5341-R | TGGAACCAAATACCCGATGC |
| 191-7.CL1574-F | TGACGCAACCACTGGATTCA |
| 191-7.CL1574-R | CAGATTGAGCCGCAGAAAGG |
| 191-8.CL2700-F | ATGGTATCGGCTGGCTGACA |
| 191-8.CL2700-R | GCTCCCCTCGTATGGCTTGT |
| 191-9.CL10581-F | GCTCATCTGATTCCCGCTCA |
| 191-9.CL10581-R | GCACATGCAGGTGTTGCATC |
| 191-10.Unigene17155-F | CATTTTTCTGGCGACCATCG |
| 191-10.Unigene17155-R | ATCTGCGCCGTCACAATGTT |
| 191-11.β-actin-F | CAGCATCATGAAGTGCGACG |
| 191-11.β-actin-R | TTCTGCATCCTGTCGGCAAT |
| 191-12.18S-F | AAGCGAAAGCATTTGCCAAG |
| 191-12.18S-R | GGCATCGTTTATGGTCGGAA |

Table S2. Top 20 GO pathways.

| Access number | Classifications | Unigenes number |
| --- | --- | --- |
| GO:0016021 | Integral component of membrane | 1093 |
| GO:0005524 | ATP binding | 520 |
| GO:0005634 | Nucleus | 388 |
| GO:0046872 | Metal ion binding | 221 |
| GO:0003677 | DNA binding | 220 |
| GO:0003676 | Nucleic acid binding | 182 |
| GO:0008270 | Zinc ion binding | 175 |
| GO:0004672 | Protein kinase activity | 138 |
| GO:0005737 | Cytoplasm | 132 |
| GO:0005509 | Calcium ion binding | 125 |
| GO:0003723 | RNA binding | 117 |
| GO:0003700 | DNA-binding transcription factor activity | 103 |
| GO:0005525 | GTP binding | 93 |
| GO:0005886 | Plasma membrane | 90 |
| GO:0004674 | Protein serine/threonine kinase activity | 88 |
| GO:0043565 | Sequence-specific DNA binding | 77 |
| GO:0005576 | Extracellular region | 77 |
| GO:0003924 | GTPase activity | 74 |
| GO:0006355 | Regulation of transcription, DNA-Templated | 70 |
| GO:0003779 | Actin binding | 68 |
